# Supplementary material
Source: PubMed Central journal article supplement (PMC7338083)
Supplement: 156703_2_supp_513960_q92qpn.pdf [file 156703_2_supp_513960_q92qpn.pdf]

# **Immunopeptidomic analysis reveals that deamidated HLA-bound peptides arise predominantly from deglycosylated precursors**

Shutao Mei<sup>1</sup>, Rochelle Ayala<sup>1</sup>, Sri H. Ramarathinam<sup>1</sup>, Patricia T. Illing<sup>1</sup>, Pouya Faridi<sup>1</sup>, Jiangning Song<sup>1</sup>, Anthony W. Purcell<sup>1\*</sup>, Nathan P. Croft<sup>1\*</sup>

## **SUPPLEMENTAL DATA**

### **1. SUPPLEMENTAL FIGURES**

**Figure S1. Length distribution of pHLA-I peptide repertoire from C1R cells expressing A\*01:01, A\*02:01, A\*24:02 or C\*04:01**

**Figure S2. Motif analysis on peptides with 9 amino acids from each allotype.**

**Figure S3. MRM peak areas for peptides detected from control versus inhibitor (Z-VAD-FMK) treated samples.**

### **2. SUPPLEMENTAL TABLES**

**Table S1. Full transition list parameters for MRM detection**

**Table S2. In-house and public pHLA-I immunopeptidomics datasets**

**Table S3. In-house and public pHLA-II immunopeptidomes datasets**

**Table S4. Conventional shotgun proteomics experimental digests (trypsin or elastase) datasets**

**Table S5. MRM measurements**

## 1. SUPPLEMENTAL FIGURES

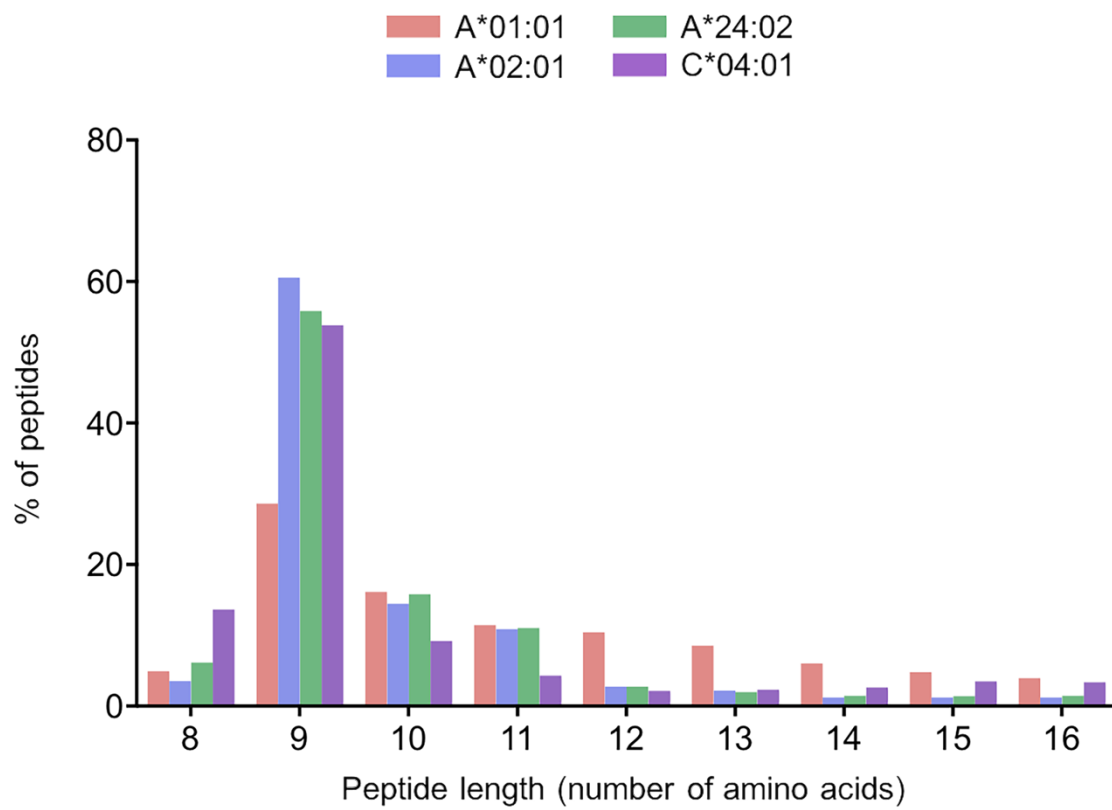

**Figure S1. Length distribution (of 8-16mers) of pHLA-I peptide repertoire from C1R cells expressing A\*01:01, A\*02:01, A\*24:02 or C\*04:01.**

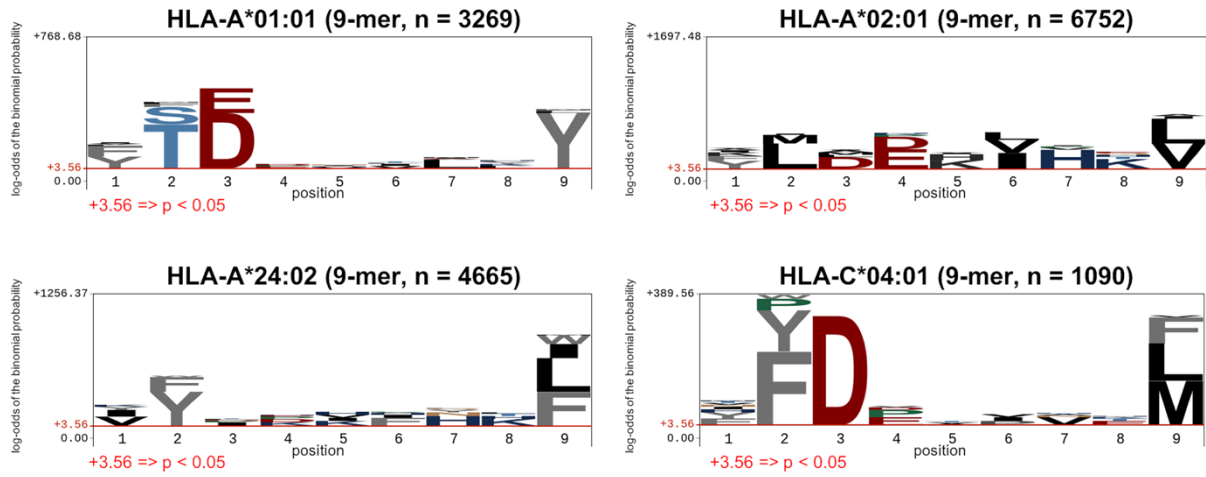

**Figure S2. Motif analysis on 9mer peptides from HLA-A\*01:01, A\*02:01, A\*24:02 and C\*04:01.** The motif analysis was generated by using pLogo (1). Amino acids above the red threshold line indicate that the log-odds of the binomial probability is significant.

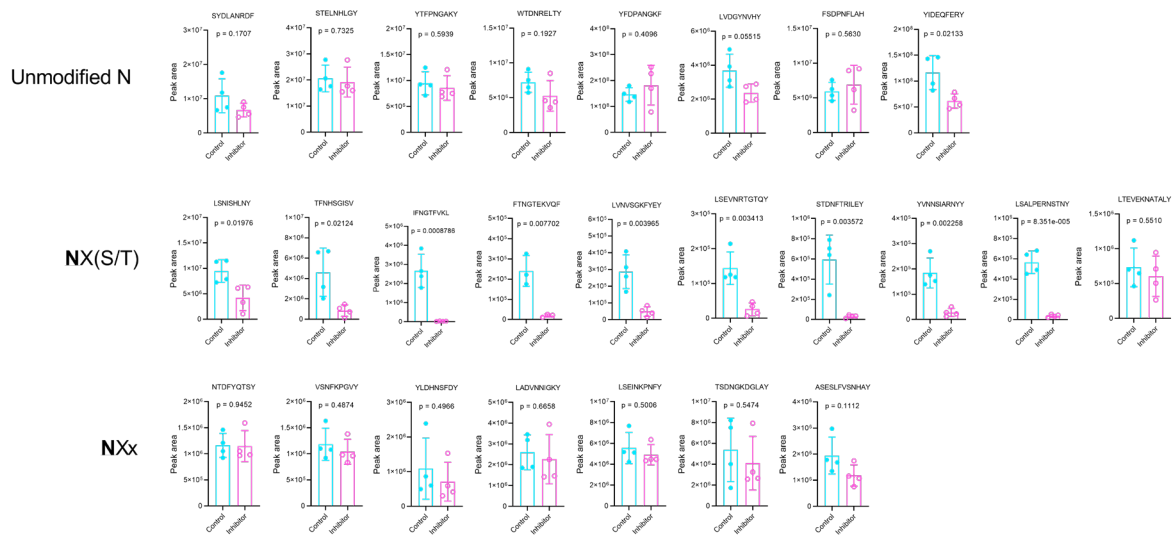

**Figure S3. MRM peak areas for peptides detected from control versus inhibitor (Z-VAD-FMK) treated samples.** Unmodified N: peptides with an Asn residue but bearing no PTMs. NX(S/T): peptides with a deamidated Asn residue and bearing the N-linked glycosylation motif (X is any amino acid except Pro). NXx: peptides with a deamidated Asn residue (x is any amino acid except Ser or Thr).

1. O'shea, J. P., Chou, M. F., Quader, S. A., Ryan, J. K., Church, G. M., and Schwartz, D. (2013) pLogo: a probabilistic approach to visualizing sequence motifs. *Nature methods* 10, 1211
